# Supplementary material for: The utility of three-dimensional computed tomography for prediction of tumor invasiveness in clinical stage IA lung adenocarcinoma
Source: PubMed Central journal article supplement — J Thorac Dis. 2020 Dec;12(12):7218–26. doi: 10.21037/jtd-20-2131 (PMC7797862; doi:10.21037/jtd-20-2131), 2020-12
Supplement: jtd-12-12-7218-dss.pdf [file jtd-12-12-7218-dss.pdf]

## Data Sharing Statement

|                     |                                                                                                                                                    |                                                                                                                  |
|---------------------|----------------------------------------------------------------------------------------------------------------------------------------------------|------------------------------------------------------------------------------------------------------------------|
| <b>Article Info</b> | http://dx.doi.org/10.21037/jtd-20-2131.                                                                                                            |                                                                                                                  |
| <b>Item</b>         | <b>Question</b>                                                                                                                                    | <b>Authors' Response<br/>(place "-" if not applicable)</b>                                                       |
| 1                   | Would you like to share data collected for your study to others?                                                                                   | Yes                                                                                                              |
| 2                   | If not, would you like to share the reason for your decision?                                                                                      | -                                                                                                                |
| 3                   | What data in particular will be shared?                                                                                                            | The CT image data used in the study are available.                                                               |
| 4                   | Any other documents will be share? Such as study protocol, statistical analysis plan, informed consent form, clinical study report, analytic code. | Nothing else is available but CT data.                                                                           |
| 5                   | When will data availability begin?                                                                                                                 | From the publication date.                                                                                       |
| 6                   | When will data availability end?                                                                                                                   | Two years within the publication date, since the technique may be updated over time.                             |
| 7                   | To whom will you share the data?                                                                                                                   | Medical oncologists and thoracic surgeons who are interested in studies of three-dimensional CT.                 |
| 8                   | For what type of analysis or purpose?                                                                                                              | For analysis to evaluate the utility of three-dimensional CT.                                                    |
| 9                   | How or where can the data/documents be obtained?                                                                                                   | Emails could be sent to the address below to obtain the shared data:<br>ykawaguchi219@gmail.com                  |
| 10                  | Any other restrictions?                                                                                                                            | We may balance the potential benefits and risks for each request and then provide the data that could be shared. |
